# Supplementary material for: Potential controlling highly-efficient catalysis of wheat-like silver particles for electrochemiluminescence immunosensor labeled by nano-Pt@Ru and multi-sites biotin/streptavidin affinity
Source: Royal Society of Chemistry journal article supplement (doi:10.1039/c0an00867b), 2011-01-01
Supplement: c0an00867b.pdf [file c0an00867b.pdf]

## Potential Controlling Highly-efficient Catalysis of Wheat-like Silver Particles for Electrochemiluminescence Immunosensor Labeled by Nano-Pt@Ru and Multi-sites Biotin-streptavidin Affinity

Li Mao,<sup>a,b</sup> Ruo Yuan,<sup>a,\*</sup> Yaqin Chai,<sup>a</sup> Ying Zhuo,<sup>a</sup> Wen Jiang<sup>a</sup>

*a. Education Ministry Key Laboratory on Luminescence and Real-Time Analysis, College of Chemistry and Chemical Engineering, Southwest University, Chongqing, China 400715. E-mail: yuanruo@swu.edu.cn*

*b. Chemical Synthesis and Pollution Control Key Laboratory of Sichuan Province, College of Chemistry and Chemical Engineering, China West Normal University, Nanchong, China 637002*

The image of Pt@Ru nanoparticles (Fig. S) was screened by transmission electron microscopy (TEM) (H600, Hitachi Instrument, Japan). In this image, the black dots are the Pt@Ru nanoparticles with average diameter about 8 nm. It can be the proof that the white highlighted irregular particle clusters with large diameter in SEM image (Fig. 1D) were actually formed by agglomerating large amount of Pt@Ru nanoparticles on multiple biotin-SA affinity sites.

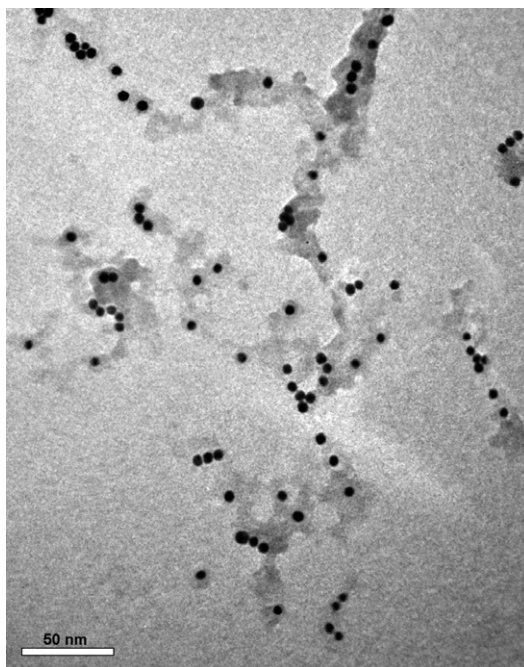

**Figure S.** TEM image of Pt@Ru nanoparticles
